# Supplementary material
Source: publisher figshare collection journal article supplement (https://acs.figshare.com/ndownloader/files/4930858)
Supplement: Supplementary file 1 [file 4930858]

# Asymmetric Restriction of Intramolecular Rotation in Chiral Solvents

Young-Jae Jin,<sup>†</sup> Hyojin Kim,<sup>†,‡</sup> Jong Jin Kim,<sup>§</sup> Nam Ho Heo,<sup>§</sup> Jong Won Shin,<sup>\*,||</sup> Masahiro Teraguchi,<sup>⊥</sup> Takashi Kaneko,<sup>⊥</sup> Toshiki Aoki<sup>\*,⊥</sup> and Giseop Kwak<sup>\*,†</sup>

<sup>†</sup>School of Applied Chemical Engineering, Major in Polymer Science and Engineering,  
Kyungpook National University 1370 Sankyuk-dong, Buk-ku, Daegu 702-701, Korea

\*Email: gkwak@knu.ac.kr

<sup>‡</sup>Daegu Technopark Nano Convergence Practical Application Center, 891-5 Daecheon-dong,  
Dalseo-ku, Daegu 704-801, Korea

<sup>§</sup>School of Applied Chemical Engineering, Major in Applied Chemistry, Kyungpook National  
University, 1370 Sankyuk-dong, Buk-ku, Daegu 702-701, Korea

<sup>||</sup>Beamline Department Pohang Accelerator Laboratory, POSTECH, 80 Jigokro-127-beongil, Nam-  
gu Pohang, Gyeongbuk, Korea

\*Email: jwshin@postech.ac.kr

<sup>⊥</sup>Department of Chemistry and Chemical Engineering, Graduate School of Science and Technol-  
ogy, and Center for Transdisciplinary Research, Niigata University, Ikarashi 2-8050, Nishi-ku, Nii-  
gata 950-2181, Japan

\*Email: toshaoki@eng.niigata-u.ac.jp

## Experimental section

Materials: TPE (purity >98.0, GC), TPB (purity >99.0, GC), PPCPD (purity >98.0, GC), TPCPD (purity >98.0, GC), and HPB were purchased from TCI in Japan (Tokyo Chemical Industry Co. Ltd.). The (+)-limonene (>99.0% ee grade:  $[\alpha]^{20}_{\text{D}} +115.5 \pm 1^\circ$ ,  $c = 10\%$  in ethanol), (–)-limonene (>99.0% ee grade:  $[\alpha]^{20}_{\text{D}} -94 \pm 4^\circ$ ,  $c = 10\%$  in ethanol), (+)-pinene (>99.0% ee grade:  $[\alpha]^{21}_{\text{D}} +50.7^\circ$ , neat) and (–)-pinene (99.0% ee grade:  $[\alpha]^{20}_{\text{D}} -50.0^\circ$ , neat) were purchased from Sigma-Aldrich.

Recrystallization of MRs in chiral solvent: All MR samples were heated in the appropriate chiral solvent solution (1-5 wt%) at 130 °C for 30 min and then cooled down to room temperature slowly to produce crystals. The excess solvent was removed by blotting using paper (Yuhan Kimberly, Ltd.) and the crystal was then rinsed with alcohol before drying in an oven at 60 °C for 3 days.

Measurements: The CD/UV-vis spectra of MR solutions were measured on a JASCO J-815 spectrometer, while the DR-CD/DR-UV-vis spectra of the MR crystals were measured with an integrating sphere compartment. The FL quantum yields of the solutions were recorded using a JASCO FP-6500 spectrofluorometer according to literature method using a quinine sulfate solution as a reference material.<sup>S1</sup> The absolute FL quantum yields of MR crystals were determined with an integrating sphere and a quantum efficiency calculation program. FL photographs were taken using a digital camera (Cannon PowerShot A2000 IS) under UV lamp of > 365 nm. Polarized microscope images were recorded using a Nikon Eclipse E600 microscope equipped with a digital camera (Nikon DS-Fi1) and a high-pressure mercury lamp (OSRAM, HBO103W/2). DSC was performed using a SETARAM DSC141-evo at a heating and cooling rate of 10 °C min<sup>-1</sup> under

N<sub>2</sub> flow. Single crystal X-ray diffraction data for the compounds were collected at 100(2) K using synchrotron radiation on an ADSC Quantum-210 detector at 2D SMC with a silicon (111) double crystal monochromator (DCM) at the Pohang Accelerator Laboratory, Korea ( $\lambda = 0.61000 - 0.63000$  Å). The PAL BL2D-SMDC software<sup>S2</sup> was used for data collection (detector distance; 63 mm, omega scan;  $\Delta\omega = 1^\circ$ , exposure time; 1 sec per frame). Cell refinement, reduction and absorption correction were performed using HKL3000sm (Ver. 703r) program.<sup>S3</sup> The crystal structures were solved by direct methods<sup>S4</sup> with SHELXS-2014, and refined by full-matrix least-squares calculation on  $F^2$  with SHELXL-2014 computer program.<sup>S5</sup> The all non-hydrogen atoms were refined with anisotropic displacement parameters and all hydrogen atoms were assigned geometrically using a riding model and constrained to ride on their parent atoms. The crystallographic data and the result of refinements are summarized in Table S3.

S1) Jin, Y.-J.; Bae, J.-E.; Cho, K.-S.; Lee, W.-E.; Hwang, D.-Y.; Kwak, G. *Adv. Funct. Mater.* **2014**, *24*, 1928-1937.

S2) Shin, J. W.; Eom, K.; Moon, D. *J. Synchrotron Rad.* **2016**, *23*, 369-373.

S3) Otwinowski Z.; Minor, W. *Methods in Enzymology*, Academic Press: New York, 1997, vol. 276, part A, p. 307.

S4) Sheldrick, G. M. *Acta Crystallogr., Sect. A.* **1990**, *46*, 467-473.

S5) Sheldrick, G. M. *Acta Crystallogr. Sect. C.* **2015**, *71*, 3-8.

**Figure S1.** a) Rotational DR-CD, DR-UV, and b) LD spectra of TPE crystals obtained from chiral limonenes.

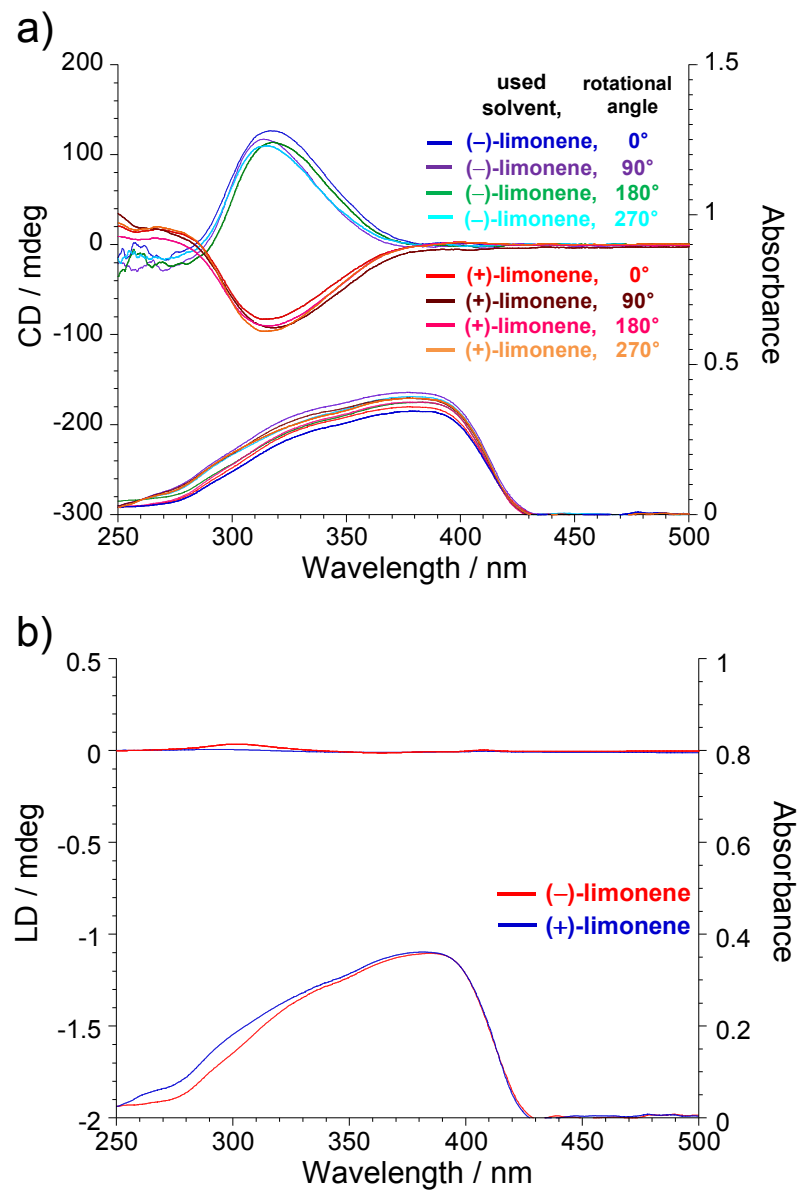

**Figure S2.** a) DR-CD and DR-UV spectra of TPE crystals obtained from chiral  $\alpha$ -pinenes and CD and UV spectra of TPE in chiral  $\alpha$ -pinene solutions, and b) rotational DR-CD and DR-UV spectra of the TPE crystal.

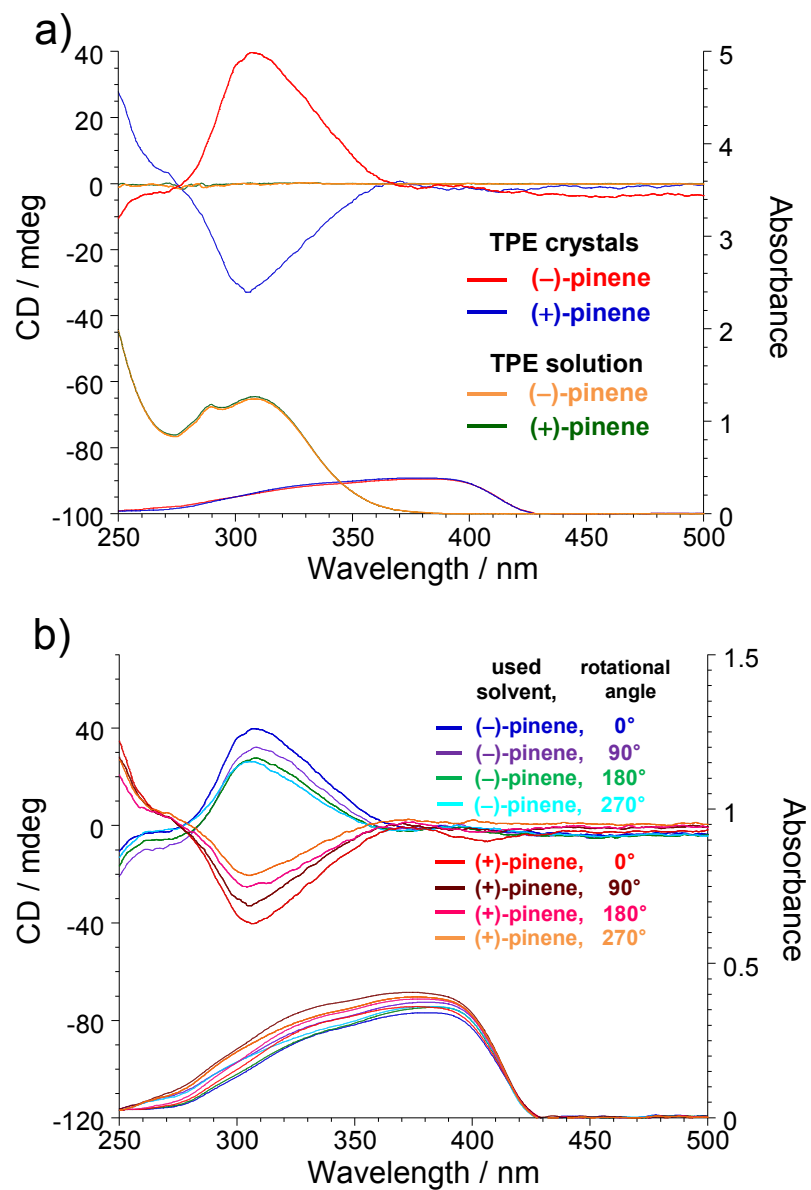

**Figure S3.** DR-CD and DR-UV spectra of the chiral crystals of a) TPB, b) PPCPD, and c) TPCPD recrystallized from chiral limonenes.

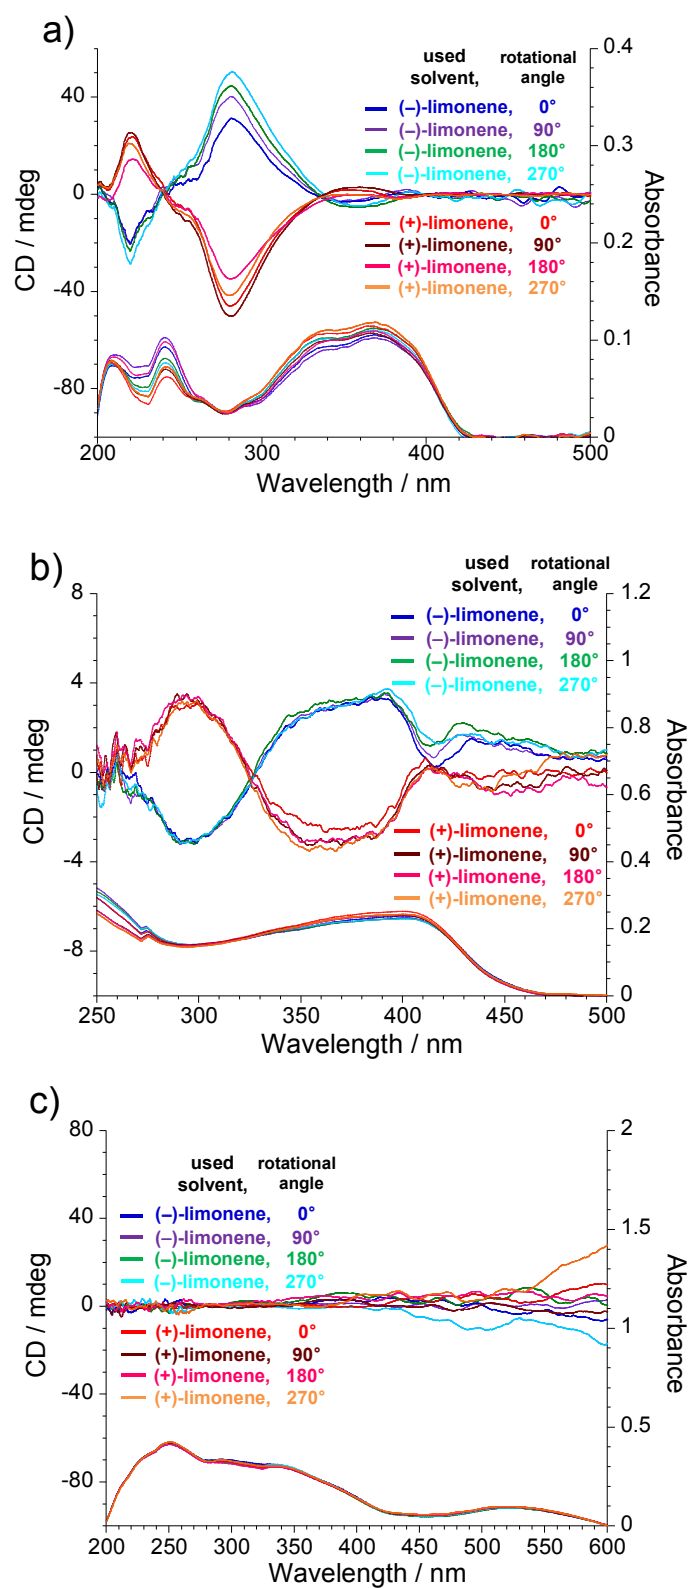

**Figure S4.** CD and UV absorption spectra of a) TPB, b) PPCPD, c) TPCPD in (-)-limonene (red line) and (+)-limonene (blue line) solutions.

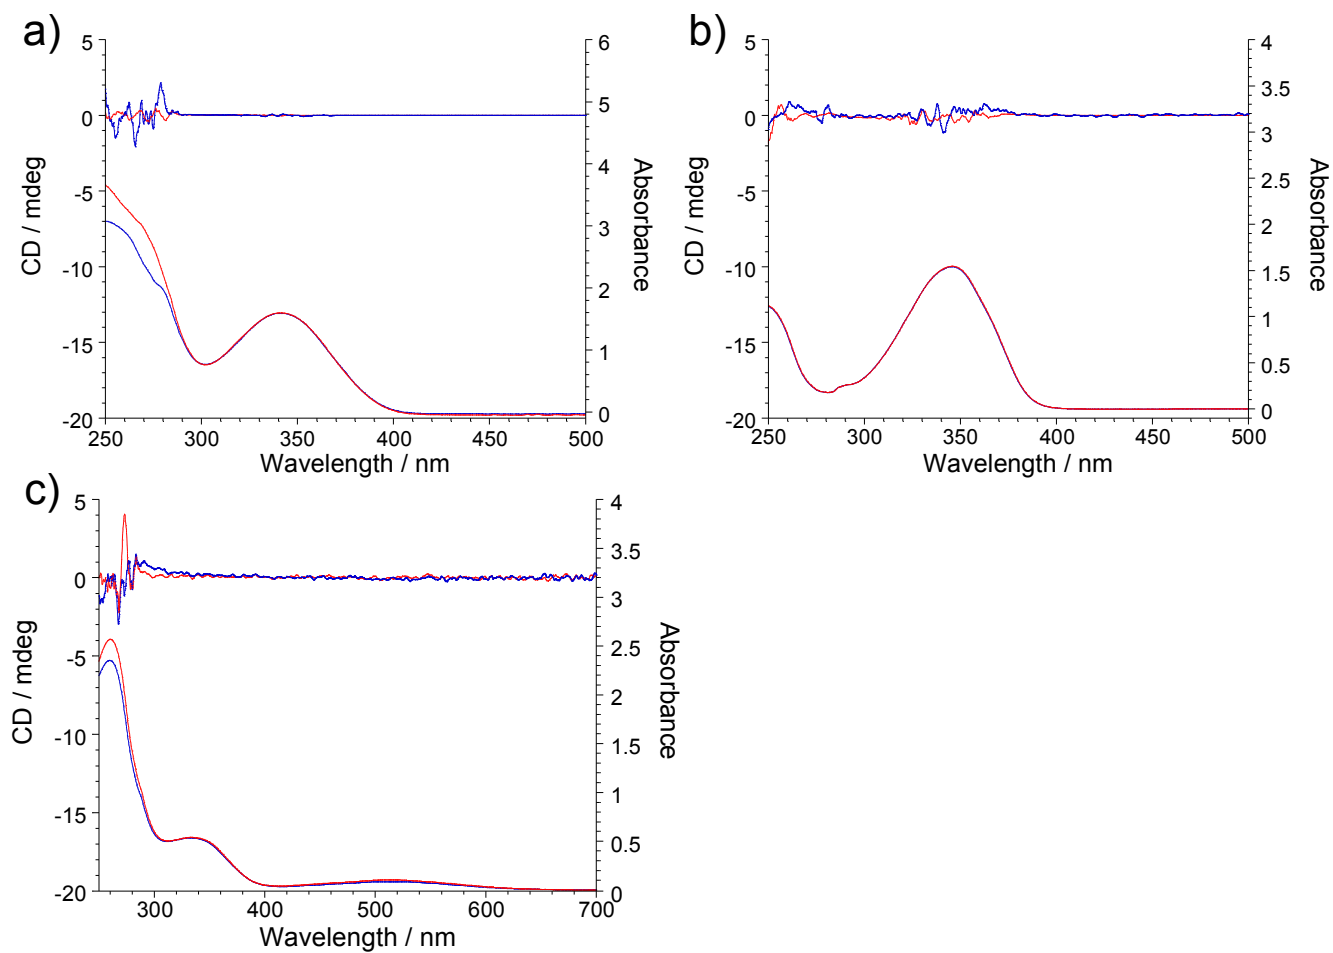

**Table S1.** Essential crystallographic data for TPE crystals recrystallized from chiral limonenes and  $\alpha$ -pinenes

|                                       | Crystal from<br>(-)-limonene | Crystal from<br>(+)-limonene | Crystal from<br>(-)- $\alpha$ -pinene | Crystal from<br>(+)- $\alpha$ -pinene |
|---------------------------------------|------------------------------|------------------------------|---------------------------------------|---------------------------------------|
| Space group                           | $P2_1$                       | $P2_1$                       | $P2_1$                                | $P2_1$                                |
| $a$ (Å)                               | 9.790(2)                     | 9.786(2)                     | 9.790(2)                              | 9.786(2)                              |
| $b$ (Å)                               | 9.1950(18)                   | 9.2050(18)                   | 9.1960(18)                            | 9.2060(18)                            |
| $c$ (Å)                               | 10.781(2)                    | 10.773(2)                    | 10.782(2)                             | 10.773(2)                             |
| $\beta$ (°)                           | 107.98(3)                    | 107.92(3)                    | 107.94(3)                             | 107.92(3)                             |
| $V$ (Å <sup>3</sup> )                 | 923.1(3)                     | 923.4(4)                     | 923.3(4)                              | 923.5(4)                              |
| $Z$                                   | 2                            | 2                            | 2                                     | 2                                     |
| torsion angle (°)<br>(C20-C7-C6-C5)   | -44.98(19)                   | 45.5(2)                      | -45.60(19)                            | 46.02(16)                             |
| torsion angle (°)<br>(C7-C20-C19-C18) | 137.86(13)                   | -137.72(14)                  | 137.62(14)                            | -137.39(12)                           |
| torsion angle (°)<br>(C7-C20-C21-C26) | -47.65(18)                   | 47.39(19)                    | -56.20(17)                            | 56.32(15)                             |
| torsion angle (°)<br>(C20-C7-C8-C13)  | 123.90(14)                   | -124.16(15)                  | 132.84(14)                            | -132.99(12)                           |



**Figure S5.** Crystal structures of TPE obtained from chiral  $\alpha$ -pinenes: a) ORTEP images with thermal ellipsoids plotted at the 50% probability level, and b) schematic illustration.

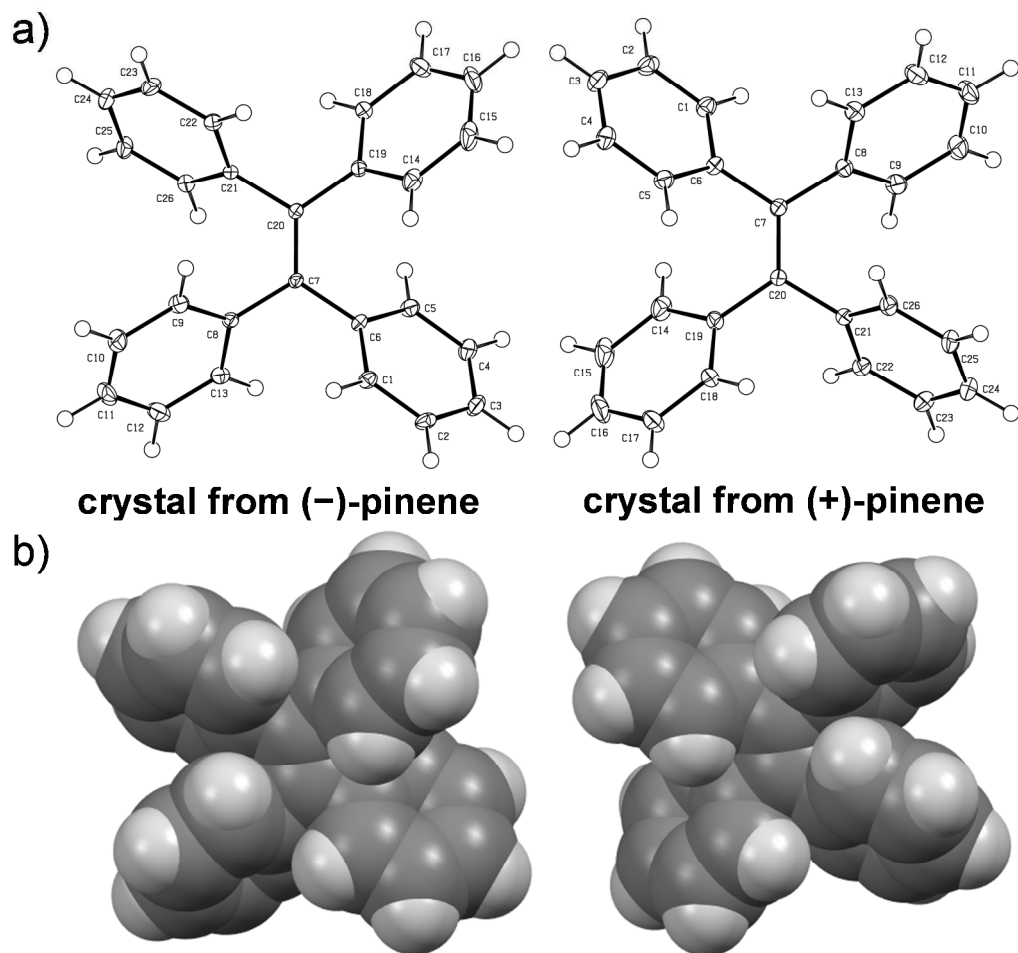

**Figure S6.** The enantiomorphs of chiral TPE crystals as observed by optical microscopy.

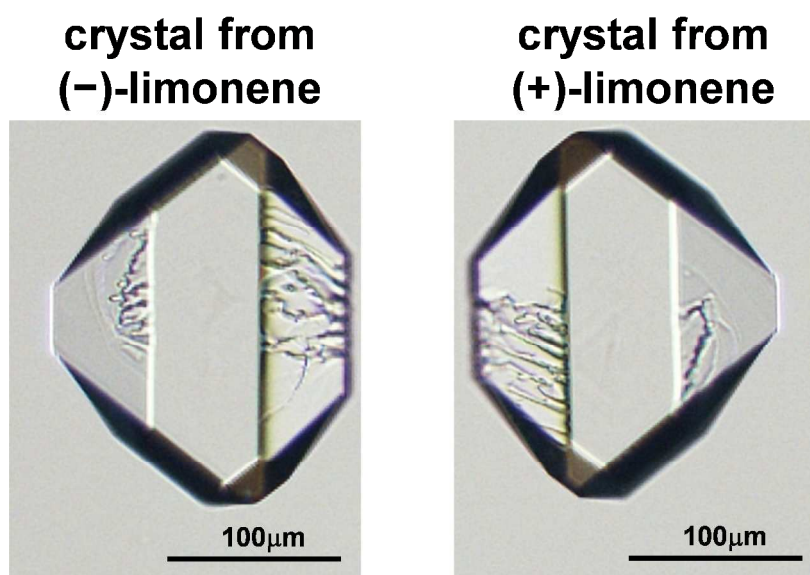

**Figure S7.** DSC thermograms of TPE crystals during heating (heating rate = 10 °C min<sup>-1</sup>).

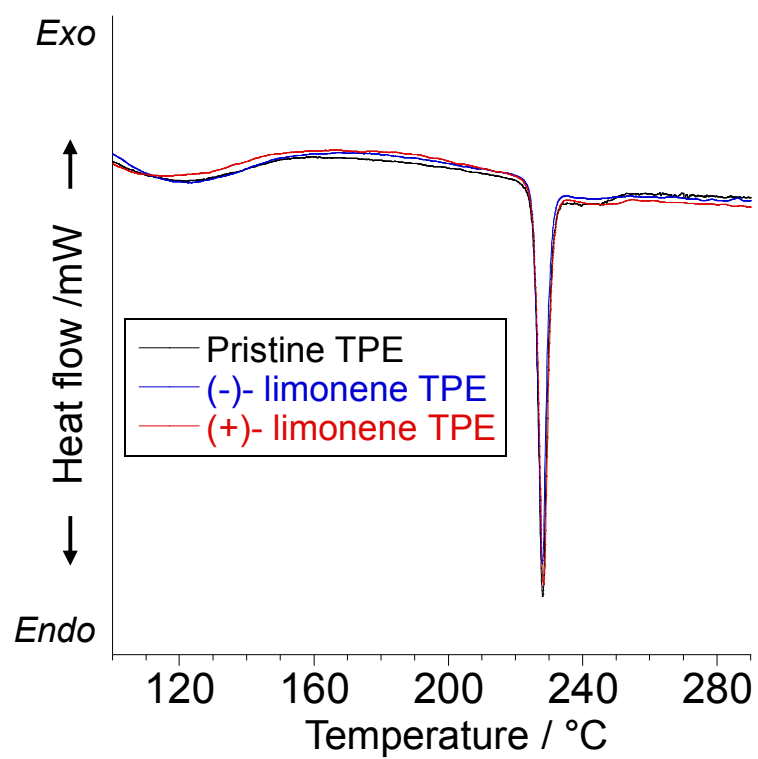

**Table S2.** FL emission properties of MRs in THF solutions and in the crystalline state

| chiral solvent, MR  | FL properties            |                               |                          |                               |
|---------------------|--------------------------|-------------------------------|--------------------------|-------------------------------|
|                     | in THF solution          |                               | in crystal state         |                               |
|                     | $\lambda_{max, FL}$ (nm) | $\Phi_{FL}$ (%) <sup>a)</sup> | $\lambda_{max, FL}$ (nm) | $\Phi_{FL}$ (%) <sup>b)</sup> |
| (-)-limonene, TPE   | 474                      | 0.018                         | 447                      | 23.4                          |
| (+)-limonene, TPE   | 472                      | 0.016                         | 448                      | 23.6                          |
| (-)-pinene, TPE     | 471                      | 0.017                         | 447                      | 24.1                          |
| (+)-pinene, TPE     | 472                      | 0.019                         | 448                      | 24.3                          |
| (-)-limonene, TPB   | 442                      | 0.22                          | 437                      | 91.2                          |
| (+)-limonene, TPB   | 446                      | 0.26                          | 437                      | 92.7                          |
| (-)-limonene, PPCPD | 445                      | 0.26                          | 471                      | 22.0                          |
| (+)-limonene, PPCPD | 444                      | 0.23                          | 472                      | 21.8                          |

<sup>a)</sup>Determined as relative fluorescence quantum yield using the reference point method.  $\Phi_s = \Phi_r(A_r F_s / A_s F_r)(\eta_s^2 / \eta_r^2)$ , where  $\Phi$  is the quantum yield, F is the measured integrated fluorescence emission intensity, A is the absorbance at  $\lambda_{max}$  and  $\eta$  is the refractive index of the solvent. The subscript 'r' refers to the reference with a known quantum yield and 's' denotes the sample. More detailed information was described in the experimental section. <sup>b)</sup>Determined as absolute fluorescence quantum yield with an integrating sphere and quantum efficiency calculation program at an excitation wavelength of 360 nm.

**Figure S8.** Crystal structures of TPCPD obtained from chiral limonenes: a) ORTEP images with thermal ellipsoids plotted at the 50% probability level. All hydrogen atoms have been omitted for clarity. b) Schematic illustration.

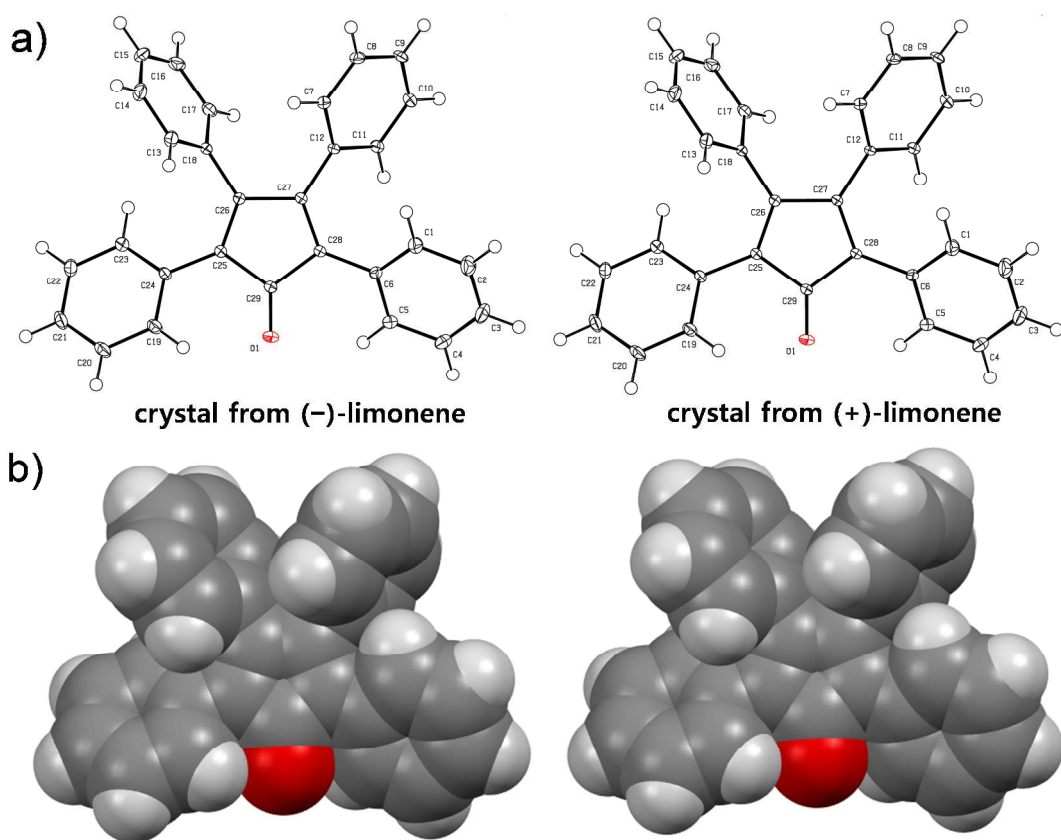

**Table S3.** Crystallographic data and structure refinement for MR crystals

| data                                                                   | crystal                         |                                 |                                 |                                 |                                   |                                   |
|------------------------------------------------------------------------|---------------------------------|---------------------------------|---------------------------------|---------------------------------|-----------------------------------|-----------------------------------|
|                                                                        | (-)-limonene<br>TPE             | (+)-limonene<br>TPE             | (-)-pinene<br>TPE               | (+)-pinene<br>TPE               | (-)-limonene<br>TPCPD             | (+)- limonene<br>TPCPD            |
| Empirical formula                                                      | C <sub>26</sub> H <sub>20</sub> | C <sub>29</sub> H <sub>20</sub> O | C <sub>29</sub> H <sub>20</sub> O |
| Formula weight                                                         | 332.42                          | 332.42                          | 332.42                          | 332.42                          | 384.45                            | 384.45                            |
| Crystal system                                                         | Monoclinic                      | Monoclinic                      | Monoclinic                      | Monoclinic                      | Monoclinic                        | Monoclinic                        |
| Space group                                                            | <i>P</i> 2 <sub>1</sub>         | <i>P</i> 2 <sub>1</sub>         | <i>P</i> 2 <sub>1</sub>         | <i>P</i> 2 <sub>1</sub>         | <i>C</i> 2/ <i>c</i>              | <i>C</i> 2/ <i>c</i>              |
| Color                                                                  | colorless                       | colorless                       | colorless                       | colorless                       | red-violet                        | red-violet                        |
| Crystal size, mm <sup>3</sup>                                          | 0.200 × 0.200 ×<br>0.150        | 0.120 × 0.100 ×<br>0.100        | 0.160 × 0.140 ×<br>0.100        | 0.120 × 0.100 ×<br>0.080        | 0.070 × 0.060 ×<br>0.040          | 0.080 × 0.050 ×<br>0.020          |
| <i>a</i> , Å                                                           | 9.790(2)                        | 9.786(2)                        | 9.790(2)                        | 9.786(2)                        | 26.139(5)                         | 26.167(5)                         |
| <i>b</i> , Å                                                           | 9.1950(18)                      | 9.2050(18)                      | 9.1960(18)                      | 9.2060(18)                      | 8.2000(16)                        | 8.1980(16)                        |
| <i>c</i> , Å                                                           | 10.781(2)                       | 10.773(2)                       | 10.782(2)                       | 10.773(2)                       | 21.507(4)                         | 21.500(4)                         |
| $\beta$ , deg                                                          | 107.98(3)                       | 107.92(3)                       | 107.93(3)                       | 107.92(3)                       | 119.81(3)                         | 119.84(3)                         |
| <i>V</i> , Å <sup>3</sup>                                              | 923.1(3)                        | 923.4(4)                        | 923.3(3)                        | 923.5(4)                        | 3999.9(17)                        | 4000.5(17)                        |
| <i>Z</i>                                                               | 2                               | 2                               | 2                               | 2                               | 8                                 | 8                                 |
| <i>d</i> <sub>calc</sub> , g cm <sup>-3</sup>                          | 1.196                           | 1.196                           | 1.196                           | 1.195                           | 1.277                             | 1.277                             |
| $\lambda$ , Å                                                          | 0.61000                         | 0.61000                         | 0.61000                         | 0.61000                         | 0.63000                           | 0.61000                           |
| <i>T</i> , K                                                           | 100(2)                          | 100(2)                          | 100(2)                          | 100(2)                          | 100(2)                            | 100(2)                            |
| $\mu$ , mm <sup>-1</sup>                                               | 0.051                           | 0.051                           | 0.054                           | 0.054                           | 0.060                             | 0.057                             |
| <i>F</i> (000)                                                         | 352                             | 352                             | 352                             | 352                             | 1616                              | 1616                              |
| Reflections collected                                                  | 9202                            | 9380                            | 9225                            | 14616                           | 20146                             | 19843                             |
| Independent reflections                                                | 5002                            | 5085                            | 5001                            | 8011                            | 5570                              | 5549                              |
| Reflections with<br><i>I</i> > 2 $\sigma$ ( <i>I</i> )                 | 4959                            | 4995                            | 4957                            | 7673                            | 4637                              | 4858                              |
| Goodness-of-fit on <i>F</i> <sup>2</sup>                               | 1.058                           | 1.041                           | 1.057                           | 1.051                           | 1.034                             | 1.057                             |
| Final R indices<br>[ <i>I</i> > 2 $\sigma$ ( <i>I</i> )] <sup>a)</sup> | <i>R</i> <sub>1</sub> = 0.0340  | <i>R</i> <sub>1</sub> = 0.0346  | <i>R</i> <sub>1</sub> = 0.0339  | <i>R</i> <sub>1</sub> = 0.0399  | <i>R</i> <sub>1</sub> = 0.0436    | <i>R</i> <sub>1</sub> = 0.0423    |
|                                                                        | <i>wR</i> <sub>2</sub> = 0.0909 | <i>wR</i> <sub>2</sub> = 0.0923 | <i>wR</i> <sub>2</sub> = 0.0904 | <i>wR</i> <sub>2</sub> = 0.1087 | <i>wR</i> <sub>2</sub> = 0.1155   | <i>wR</i> <sub>2</sub> = 0.1173   |
| Final R indices<br>[all data] <sup>a)</sup>                            | <i>R</i> <sub>1</sub> = 0.0349  | <i>R</i> <sub>1</sub> = 0.0353  | <i>R</i> <sub>1</sub> = 0.0348  | <i>R</i> <sub>1</sub> = 0.0419  | <i>R</i> <sub>1</sub> = 0.0537    | <i>R</i> <sub>1</sub> = 0.0480    |
|                                                                        | <i>wR</i> <sub>2</sub> = 0.0911 | <i>wR</i> <sub>2</sub> = 0.0927 | <i>wR</i> <sub>2</sub> = 0.0906 | <i>wR</i> <sub>2</sub> = 0.1099 | <i>wR</i> <sub>2</sub> = 0.1226   | <i>wR</i> <sub>2</sub> = 0.1216   |

<sup>a)</sup>  $R_1 = \Sigma ||F_o| - |F_c|| / \Sigma |F_o|$ ,  $wR_2 = [\Sigma w(F_o^2 - F_c^2)^2 / \Sigma w(F_o^2)^2]^{1/2}$ .
